# Supplementary material for: Real-World Insurance Claims Analysis of Venous Thromboembolism in Japanese Patients with Inflammatory Bowel Disease
Source: Springer Nature journal article supplement (doi:10.1007/s10620-022-07388-w), 2022-02-12
Supplement: MOESM1 [file 20127732]

**Table S1** Potential risk factors analyzed

| Variable                              | Definition                                                                                                                                                                                                                                                                                                                                                                                                                                                                                                 |
|---------------------------------------|------------------------------------------------------------------------------------------------------------------------------------------------------------------------------------------------------------------------------------------------------------------------------------------------------------------------------------------------------------------------------------------------------------------------------------------------------------------------------------------------------------|
| Sex                                   | Male/female at index date                                                                                                                                                                                                                                                                                                                                                                                                                                                                                  |
| Age                                   | $\leq 39/40-59/\geq 60$ years at index date                                                                                                                                                                                                                                                                                                                                                                                                                                                                |
| Extraintestinal manifestations of IBD | Yes/no (pyoderma gangrenosum, uveitis, peripheral arthritis, ankylosing spondylitis, and primary sclerosing cholangitis) from 6 months before index date to date censored at the end of the follow-up period for patients without VTE, or end of study (May 2018), whichever was earlier (retrospective cohort study), and from 6 months before index date to onset date of VTE for patients with VTE, or matching time point for non-VTE patients (nested case-control study)                             |
| Surgery                               | Yes/no from 6 months before index date to date censored at the end of the follow-up period for patients without VTE, or end of study (May 2018), whichever was earlier (retrospective cohort study), and from 6 months before index date to onset date of VTE for patients with VTE                                                                                                                                                                                                                        |
| Treatment history                     | Yes/no from 6 months before index date to date censored at the end of the follow-up period for patients without VTE, or end of study (May 2018), whichever was earlier (retrospective cohort study), and from 6 months before index date to onset date of VTE for patients with VTE, or matching time point for non-VTE patients (nested case-control study):<br>(i) 5-aminosalicylates<br>(ii) Steroids<br>(iii) Immunomodulators<br>(iv) Tumor necrosis factor inhibitors<br>(v) Central venous catheter |

|                                 |                                                                                                                                                                                                                                                                                                                                                                                                                                                                                                                                                                                                                                   |
|---------------------------------|-----------------------------------------------------------------------------------------------------------------------------------------------------------------------------------------------------------------------------------------------------------------------------------------------------------------------------------------------------------------------------------------------------------------------------------------------------------------------------------------------------------------------------------------------------------------------------------------------------------------------------------|
| CV risk <sup>†</sup>            | <p>Yes/no from 6 months before index date to date censored at the end of the follow-up period for patients without VTE, or end of study (May 2018), whichever was earlier (retrospective cohort study), and from 6 months before index date to onset date of VTE for patients with VTE, or matching time point for non-VTE patients (nested case-control study):</p> <p>(i) Hypertension, high-density lipoprotein, diabetes mellitus, history of coronary artery disease, heart failure</p> <p>(ii) Hypertension, high-density lipoprotein, diabetes mellitus</p> <p>(iii) History of coronary artery disease, heart failure</p> |
| Inherited coagulation disorders | <p>Yes/no (protein C deficiency; ICD-10 code D68.5) from 6 months before index date to date censored at the end of the follow-up period for patients without VTE, or end of study (May 2018), whichever was earlier (retrospective cohort study), and from 6 months before index date to onset date of VTE for patients with VTE, or matching time point for non-VTE patients (nested case-control study)</p>                                                                                                                                                                                                                     |
| History of VTE                  | <p>Yes/no from 12 months before index date to index date</p>                                                                                                                                                                                                                                                                                                                                                                                                                                                                                                                                                                      |
| Hormone therapy                 | <p>Yes/no (oral contraceptive, hormone replacement therapy [estrogen, androgen, etc.]) from 6 months before index date to date censored at the end of the follow-up period for patients without VTE, or end of study (May 2018), whichever was earlier (retrospective cohort study), and from 6 months before index date to onset date of VTE for patients with VTE, or matching time point for non-VTE patients (nested case-control study)</p>                                                                                                                                                                                  |

|                          |                                                                                                                                                                                                                                                                                                                                                                                                                             |
|--------------------------|-----------------------------------------------------------------------------------------------------------------------------------------------------------------------------------------------------------------------------------------------------------------------------------------------------------------------------------------------------------------------------------------------------------------------------|
| Malignancy               | Yes/no from 6 months before index date to date censored at the end of the follow-up period for patients without VTE, or end of study (May 2018), whichever was earlier (retrospective cohort study), and from 6 months before index date to onset date of VTE for patients with VTE, or matching time point for non-VTE patients (nested case-control study)                                                                |
| Undergoing major surgery | Yes/no (including gastrointestinal surgery and other major surgeries) from 6 months before index date to date censored at the end of the follow-up period for patients without VTE, or end of study (May 2018), whichever was earlier (retrospective cohort study), and from 6 months before index date to onset date of VTE for patients with VTE, or matching time point for non-VTE patients (nested case-control study) |

---

†Defined as International Classification of Diseases, 10<sup>th</sup> revision (ICD-10) codes for hypertension (I10–15), hyperlipidemia; unspecified (E785), high-density lipoprotein deficiency (E786), diabetes mellitus (E10–14), history of coronary artery disease (I20–25), or heart failure (I50, I50.0, I50.1, I50.9)

*IBD* inflammatory bowel disease, *VTE* venous thromboembolism

**Table S2** Bed counts and concordance rate of medical facility in IBD, UC, and CD cohorts in the retrospective cohort study

|                                                                 | IBD<br><i>N</i> = 16 273 | UC<br><i>N</i> = 13 585 | CD<br><i>N</i> = 3443 |
|-----------------------------------------------------------------|--------------------------|-------------------------|-----------------------|
| Bed counts of medical facility at index, <i>n</i> (%)           |                          |                         |                       |
| 0–19                                                            | 5793 (35.6)              | 5298 (39.0)             | 668 (19.4)            |
| 20–99                                                           | 1667 (10.2)              | 1283 (9.4)              | 493 (14.3)            |
| 100–199                                                         | 1143 (7.0)               | 936 (6.9)               | 246 (7.1)             |
| 200–299                                                         | 821 (5.0)                | 698 (5.1)               | 165 (4.8)             |
| 300–499                                                         | 2432 (14.9)              | 1965 (14.5)             | 603 (17.5)            |
| 500+                                                            | 4415 (27.1)              | 3403 (25.0)             | 1268 (36.8)           |
| Unknown                                                         | 2 (0.0)                  | 2 (0.0)                 | 0 (0.0)               |
| VTE event, <i>n</i> (%)                                         |                          |                         |                       |
|                                                                 | 215 (1.32)               | 160 (1.18)              | 65 (1.89)             |
| Concordance rate of medical facility, <sup>†</sup> <i>n</i> (%) |                          |                         |                       |
|                                                                 | 99 (46.0)                | 74 (46.3)               | 32 (49.2)             |
| Bed counts of medical facility during VTE event, <i>n</i> (%)   |                          |                         |                       |
| 0–19                                                            | 6 (2.8)                  | 6 (3.8)                 | 0 (0.0)               |
| 20–99                                                           | 3 (1.4)                  | 3 (1.9)                 | 0 (0.0)               |
| 100–199                                                         | 6 (2.8)                  | 5 (3.1)                 | 1 (1.5)               |
| 200–299                                                         | 7 (3.3)                  | 7 (4.4)                 | 0 (0.0)               |
| 300–499                                                         | 31 (14.4)                | 23 (14.4)               | 8 (12.3)              |
| 500+                                                            | 162 (75.3)               | 116 (72.5)              | 56 (86.2)             |
| Unknown                                                         | 0 (0.0)                  | 0 (0.0)                 | 0 (0.0)               |

<sup>†</sup>Concordance rate of medical facility between where each index date is defined and where each VTE event is identified

*CD* Crohn's disease, *IBD* inflammatory bowel disease, *N* number of patients in the analysis population, *n* number of patients in the category, *UC* ulcerative colitis, *VTE* venous thromboembolism

**Fig. S1** Incidence of **a** DVT and **b** PE in patients with IBD; incidence of **c** DVT and **d** PE in patients with UC; incidence of **e** DVT and **f** PE in patients with CD, by potential risk factors in the retrospective cohort study

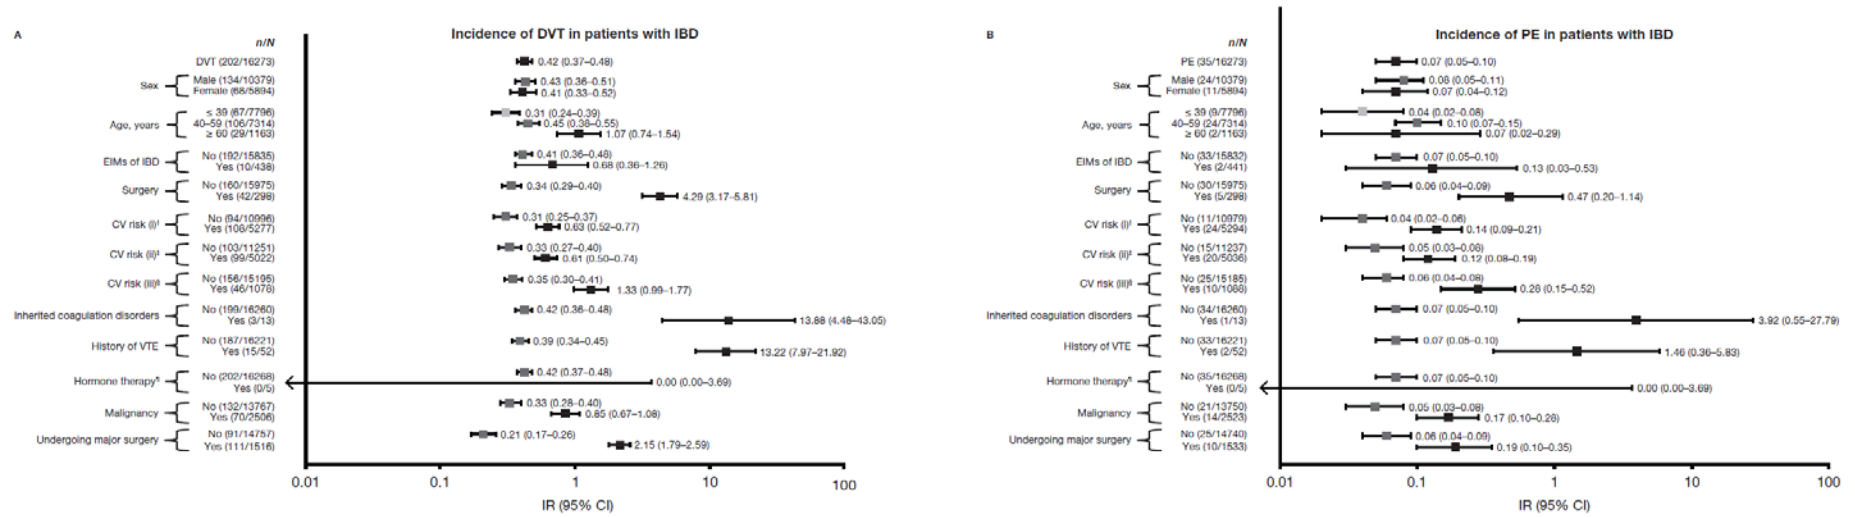

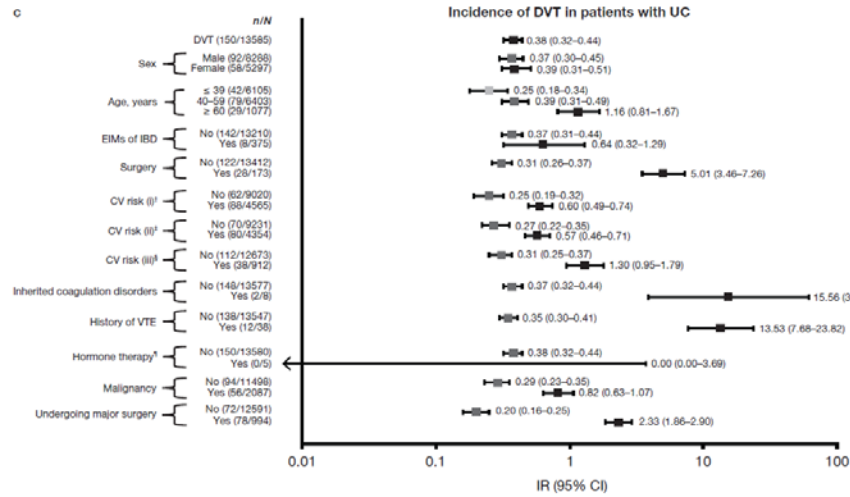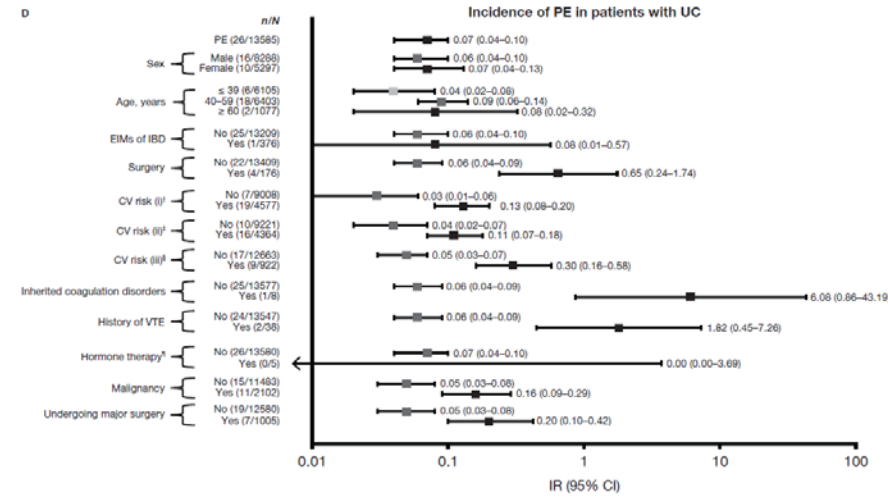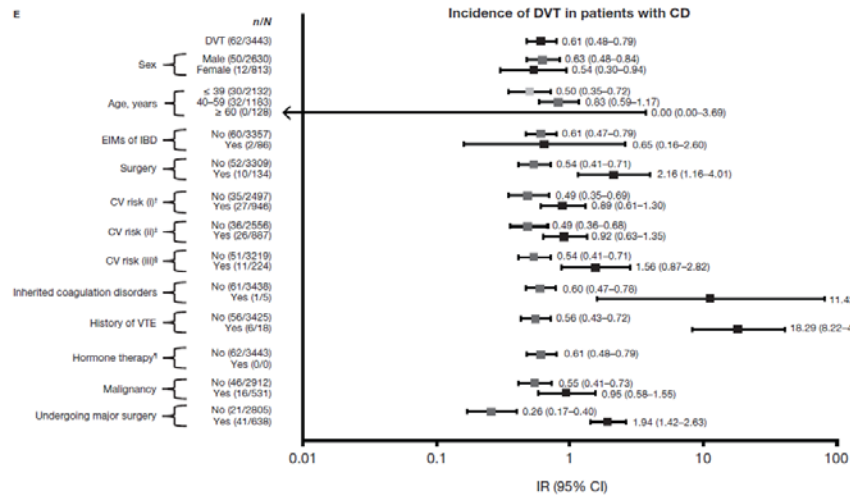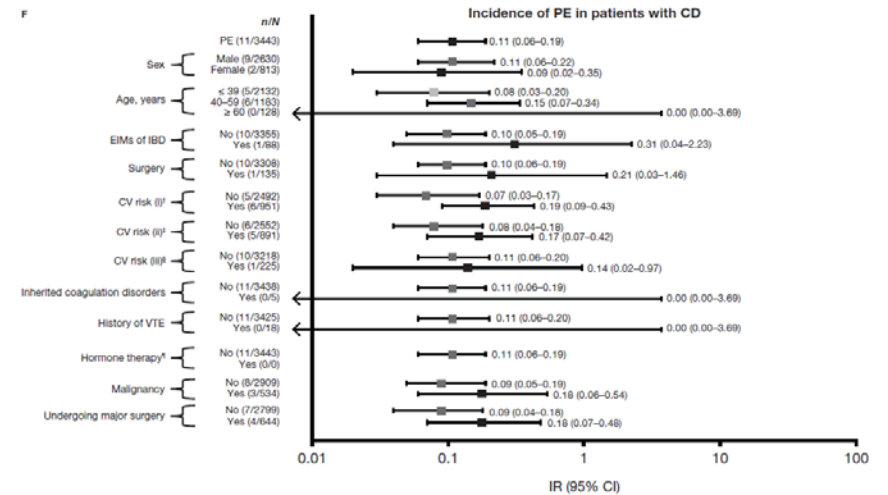

<sup>†</sup>CV risk (i): hypertension, high-density lipoprotein, diabetes mellitus, history of coronary artery disease, heart failure

<sup>‡</sup>CV risk (ii): hypertension, high-density lipoprotein, diabetes mellitus

§CV risk (iii): history of coronary artery disease, heart failure

¶Hormone therapy: oral contraceptive, hormone replacement therapy

*CD* Crohn's disease, *CI* confidence interval, *CV* cardiovascular, *DVT* deep vein thrombosis, *EIM* extraintestinal manifestation, *IBD*

inflammatory bowel disease, *IR* incidence rate (unique patients with events per 100 patient-years), *N* number of patients in the analysis

population, *n* number of patients in the category, *PE* pulmonary embolism, *UC* ulcerative colitis, *VTE* venous thromboembolism

**Fig. S2** Incidence of **a** DVT and **b** PE in patients with IBD; incidence of **c** DVT and **d** PE in patients with UC; incidence of **e** DVT and **f** PE in patients with CD, by treatment history in the retrospective cohort study

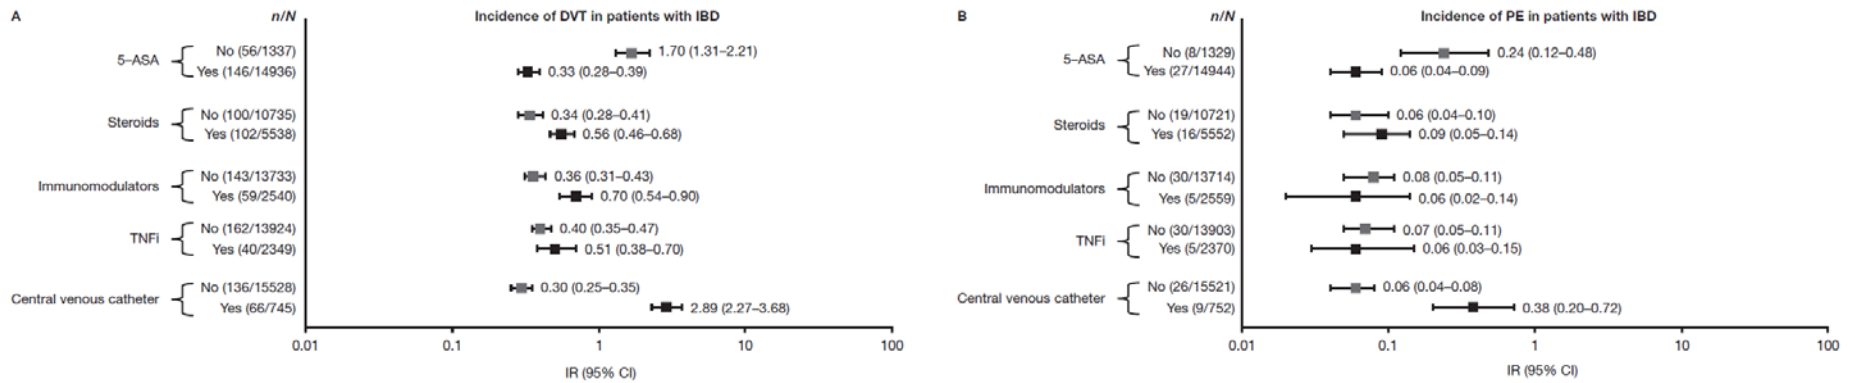



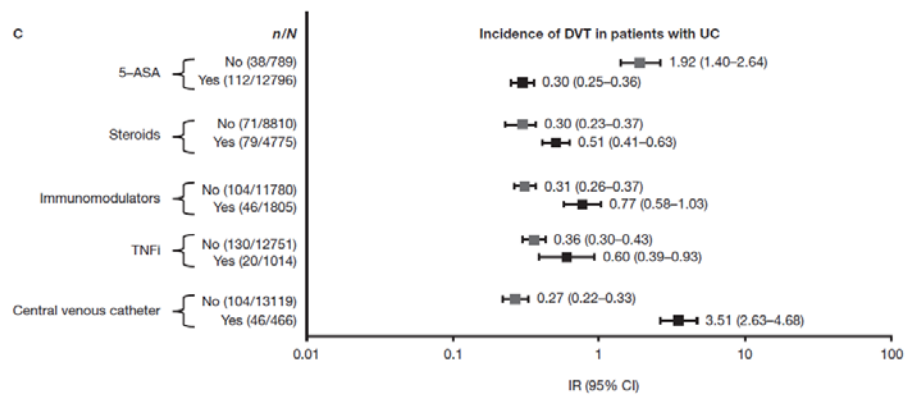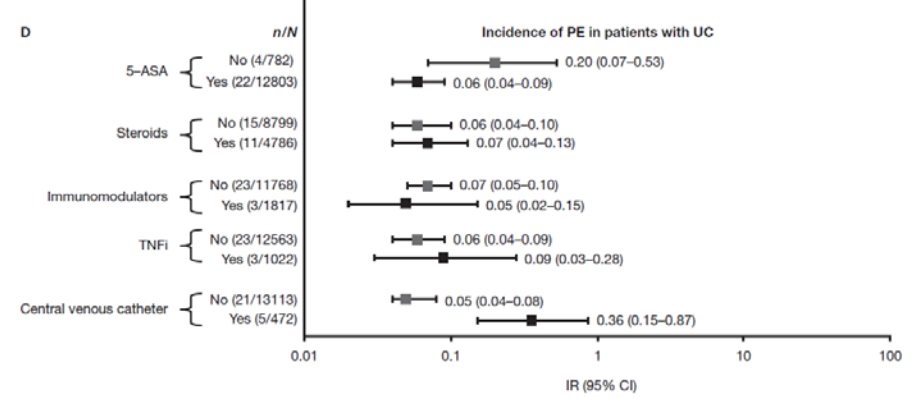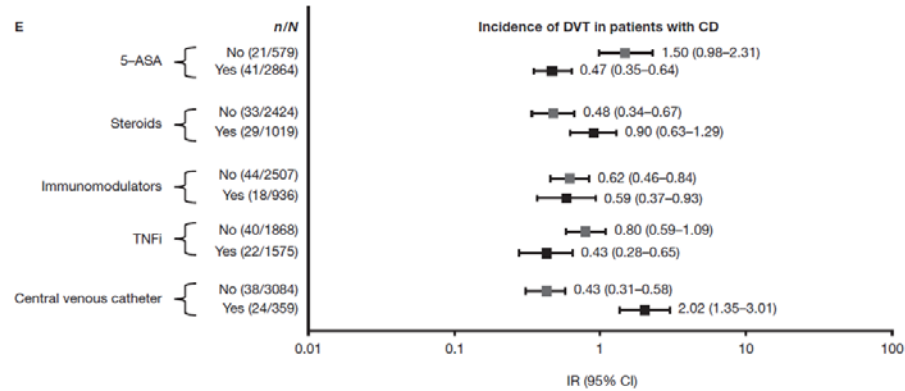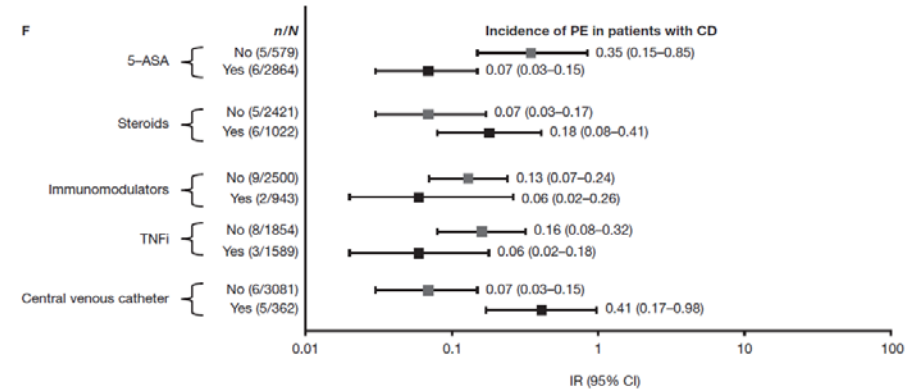

5-ASA 5-aminosalicylates, CD Crohn's disease, CI confidence interval, DVT deep vein thrombosis, IBD inflammatory bowel disease, IR incidence rate (unique patients with events per 100 patient-years), N number of patients in the analysis population, n number of patients in the category, PE pulmonary embolism, TNFi tumor necrosis factor inhibitors, UC ulcerative colitis
